# Supplementary material for: Long-Term Change in Renal Function After Intravitreal Anti-VEGF Treatment for Diabetic Macular Edema: A 2-Year Retrospective Cohort Study
Source: Springer Nature journal article supplement (doi:10.1007/s40123-023-00771-4), 2023-08-17
Supplement: MOESM2 [file 25932580]

**Long-term Renal Function Change after Intravitreal Anti-VEGF Treatment for**

**Diabetic Macular Edema – A 2-Year Retrospective Cohort Study**

**Running title:** Renal function change after intravitreal anti-VEGF in DME

Yi-Chung Fang, MD<sup>1</sup>, Ivan Pochou Lai, MD<sup>2</sup>, Tso-Ting Lai, MD<sup>2</sup>, Ta-Ching Chen,  
MD PhD<sup>2</sup>, Chang-Hao Yang, MD PhD<sup>2,3</sup>, Tzyy-Chang Ho, MD<sup>2</sup>, Chung-May Yang,  
MD<sup>2,3</sup>, Yi-Ting Hsieh, MD PhD<sup>2</sup>

<sup>1</sup>National Taiwan University Hospital, Taipei, Taiwan.

<sup>2</sup>Department of Ophthalmology, National Taiwan University Hospital, Taipei, Taiwan.

<sup>3</sup>College of Medicine, National Taiwan University, Taipei, Taiwan

**Corresponding author:** Yi-Ting Hsieh, MD PhD

ORCID: 0000-0003-2258-154X

Department of Ophthalmology, National Taiwan University Hospital

7 Zhongshan S. Rd., Zhongzheng Dist., Taipei, 10002, Taiwan

Tel: 886-2-23123456 ext. 262131

Fax: 886-2-23934420

E-mail: [ythyth@ntuh.gov.tw](mailto:ythyth@ntuh.gov.tw)

Prior Presentation: This manuscript is based on work that has been previously

presented in APVRS 2021 virtually on Dec 11–12, 2021. Reference:

<https://2021.apvrs.org/wp-content/uploads/2021/12/APVRS-Abstract-Book-2021.pdf>

Supplementary Table 1. Best-corrected visual acuity, central foveal thickness and optical coherence tomography characteristics at baseline optical coherence tomography in different groups of estimated glomerular filtration rate.

|      | Baseline eGFR (mL/min) |                  |                 |                 |                 | <i>P</i> value |
|------|------------------------|------------------|-----------------|-----------------|-----------------|----------------|
|      | >120<br>(n=10)         | 91-120<br>(n=14) | 61-90<br>(n=32) | 31-60<br>(n=40) | 16-30<br>(n=12) |                |
| BCVA | 0.61±0.36              | 0.68±0.40        | 0.68±0.40       | 0.72±0.34       | 0.67±0.32       | 0.85           |
| CFT  | 462.6±143.0            | 391.2±134.0      | 420.8±135.0     | 456.7±161.6     | 405.1±78.2      | 0.52           |
| IRC  | 10 (100%)              | 11 (79%)         | 30 (94%)        | 39 (98%)        | 12 (100%)       | 0.13           |
| SRF  | 4 (40%)                | 4 (29%)          | 4 (13%)         | 9 (23%)         | 1(8%)           | 0.26           |
| EZD  | 2 (20%)                | 3 (21%)          | 7 (22%)         | 9 (23%)         | 3 (25%)         | 1.0            |

BCVA: best-corrected visual acuity, CFT: central foveal thickness, IRC: intraretinal cysts, SRF: subretinal fluid, EZD: ellipsoid zone disruption.

Supplementary Table 2.Changes of serum HbA1c, systolic blood pressure and serum creatinine at 3, 6, 12, 18 and 24 months after intravitreal injection of anti-vascular endothelial growth factor.

|          | Serum<br>HbA1c<br>(%) | <i>P</i> value | Systolic blood<br>pressure<br>(mm Hg) | <i>P</i> value | Serum<br>creatinine<br>(mg/DL) | <i>P</i> value |
|----------|-----------------------|----------------|---------------------------------------|----------------|--------------------------------|----------------|
| Baseline | 7.2 ± 1.2             | -              | 134.0 ± 15.6                          | -              | 1.20 ± 0.59                    | -              |
| Month 3  | 7.2 ± 1.2             | 0.39           | 134.0 ± 14.4                          | 1              | 1.40 ± 1.04                    | 0.029          |
| Month 6  | 7.2 ± 1.2             | 0.54           | 132.9 ± 14.2                          | 0.48           | 1.46 ± 1.03                    | 0.002          |
| Month 12 | 7.1 ± 1.2             | 0.40           | 133.9 ± 18.0                          | 0.96           | 1.51 ± 1.22                    | < 0.001        |
| Month 18 | 7.2 ± 1.4             | 0.89           | 131.8 ± 15.7                          | 0.26           | 1.55 ± 1.27                    | < 0.001        |
| Month 24 | 7.1 ± 1.2             | 0.15           | 132.3 ± 12.3                          | 0.62           | 1.63 ± 1.45                    | < 0.001        |
